# 1 Understanding Diagnostic Error Patterns and Contributing Factors: A Descriptive 2 Analysis of Medical Error Reports at a Tertiary Hospital in Kenya 2019-2021

4 Authors: Lydia Okutoyi<sup>1,2</sup>, Pamela Godia<sup>1</sup>, Mary Adam<sup>3,4</sup>, Dr Fred Sitati<sup>1</sup>, Walter Jaoko<sup>1</sup>

5 Affiliations: University of Nairobi<sup>1</sup>

6 Kenyatta National Hospital, Nairobi Kenya<sup>2</sup>

7 Kijabe Mission Hospital, Kiambu Kenya<sup>3</sup>,

8 ACQUIRE, Nairobi Kenya<sup>4</sup>. The African Consortium for Quality

9 Improvement Research in Frontline Healthcare

10

11 Address the corresponding author:

12 Lydia Okutoyi, Health Care Quality Division, Kenyatta National Hospital,

13 email [lydiaoctoy@gmail.com](mailto:lydiaoctoy@gmail.com)

14

15 These authors contributed equally to this work.

16

## 17 ABSTRACT

### 18 Background

19 Diagnostic errors in healthcare pose substantial risks, leading to increased costs, patient  
20 anxiety, and delayed diagnoses. Despite its prevalence, diagnostic errors have historically  
21 received less attention compared to other medical errors, necessitating urgent action to address  
22 these critical issues. This is more so in the low- and middle-income countries. (LMICs). This  
23 study aimed to analyze patterns and associated factors of diagnostic error reported to the Patient  
24 Safety Unit of Kenyatta National Hospital (KNH), a tertiary teaching hospital in Nairobi,  
25 Kenya.

### 26 Methods

27 This was a descriptive retrospective study of medical error reports(MER) forms submitted to  
28 KNH from 2019-2021.Type of medical errors, contributing factors , site ,timing of error, and  
29 outcome were recorded. Descriptive statistics, chi-square tests, and logistic regression were  
30 employed to assess error types, contributing factors, and associated likelihoods.

### 31 Results

32 Among 640 MER forms analysed, diagnostic errors were reported in 40 percent of cases,  
33 predominantly associated with delayed diagnosis, wrong diagnosis, and failure to test.  
34 Contributing factors to MER included communication issues (36.1%), staff-related factors  
35 (48.9%), and equipment issues (15.6%). Diagnostic errors were more likely during non-  
36 working hours (OR 1.969,  $p < 0.047$ ) and in Accident and Emergency department (OR 2.36,  $p$   
37  $< 0.022$ ) within KNH.

### 38 Conclusion

39 Diagnostic errors represent a significant proportion of medical errors at KNH, particularly in  
40 Accident and Emergency settings. Strategies to involve more physicians in error reporting and  
41 enhance communication practices are recommended.

42 **Keywords:** Diagnostic errors; Medical error reporting; Patient safety.

43

44

45

46

47

48

49

## 50 INTRODUCTION

51 Diagnostic errors pose significant risks and challenges in healthcare delivery, often leading to  
52 increased costs, heightened patient anxiety, and, in critical cases, delayed diagnoses [1, 2].  
53 Research indicates that these errors are pervasive, with one in every 20 patients experiencing  
54 such an error in population-based studies [3]. Diagnostic errors are noted to have a likelihood  
55 of causing moderate to severe harm compared to other types of errors[4]. Despite their  
56 prevalence, diagnostic errors have historically received less attention compared to other  
57 medical errors, necessitating urgent action to address these critical issues [5–7]. This  
58 discrepancy has underscored the urgent need for focused research and interventions to address  
59 diagnostic errors comprehensively.

60 Diagnostic error, broadly defined as missed opportunities in diagnosis or follow-up actions  
61 based on available evidence, reflects both provider and systemic shortcomings [1]. Errors can  
62 manifest as delayed, incorrect, or missed diagnoses. Research by Graber et al. (2005) and  
63 Henriksen et al. (2015) has highlighted the complexities of diagnostic errors, emphasizing the  
64 multifaceted nature of these incidents[6, 8]. The errors can arise from a variety of causes,  
65 including cognitive biases, system failures, and breakdowns in communication [9, 10].

66

67 Addressing diagnostic errors requires robust strategies for identification and documentation to  
68 enable accurate measurement. Previous reliance on autopsy and malpractice reports has proven  
69 inadequate, highlighting the need for a systemic approach that extends beyond individual  
70 practitioners to encompass the entire diagnostic process [6, 8]. Indeed being able to measure  
71 diagnostic errors is essential. Despite increasing awareness of diagnostic errors, they remain  
72 challenging to identify and report within healthcare systems [4]. Healthcare providers involved  
73 in diagnostic errors often exhibit reluctance to report incidents due to concerns about  
74 professional reputation and legal repercussions [4, 5]. This reluctance highlights the critical  
75 need for improved reporting mechanisms that prioritize learning and system improvement over  
76 punitive measures.

77 Diagnostic errors pose reporting challenges across various medical specialties, including  
78 instances occurring in operating theatres or identified through radiology examinations [6, 11].  
79 Medical error reporting systems, while essential for patient safety, often present incomplete  
80 pictures of incidents due to the timing of reporting and the inherent limitations of individual  
81 clinical judgment [3, 11]. In the USA, diagnostic safety has been accorded the need attention  
82 by the academics and the clinician in the annual Diagnostic Errors in Medicine (DEM)  
83 conferences over the past decade, yet this topic remains less addressed in low- and middle-  
84 income countries (LMIC) [5].

85

86 Patient-provider interactions were the highest contributing factors for diagnostic errors, while  
87 patient related factors were the lowest in a Japan study where patients who had an unscheduled  
88 visit back to the outpatient department within 14 days of prior visit[12]. In a large study among  
89 21 hospitals in the Netherlands human failure (96.3%) was identified as the main cause of  
90 diagnostic adverse events, while organizational and patient related factors also contributed (  
91 25% and 30.0% respectively)[13]. Other studies note patient-provider factors and  
92 communication among the care team have been noted to be the two leading contributors to  
93 diagnostic errors[14, 15].

94

95 Despite the existence of a Medical Error Reporting (MER) system at Kenyatta National  
96 Hospital (KNH) for seven years, detailed studies on diagnostic errors within this framework

97 are lacking. This study aimed to analyze the patterns and factors associated with diagnostic  
98 errors reports .

## 99 **METHODS**

### 100 **Study Design and Setting**

101 This was a descriptive retrospective study. Data were collected from medical error reports  
102 submitted to the Kenyatta National Hospital (KNH) Medical Error Reporting System spanning  
103 from January 2019 to December 2021. Data extraction and data entry were conducted between  
104 January 2022 and March 2022. Kenyatta National Hospital is a tertiary care teaching hospital  
105 in Nairobi, Kenya. During this period, KNH utilized a paper-based Medical Error Reporting  
106 (MER) form. The form is a 14-field document that adheres to World Health Organization  
107 (WHO) standards for reporting medical errors while maintaining patient and healthcare  
108 provider anonymity[16]. It includes key fields such as the date of error occurrence, patient  
109 information (excluding identifiers like names), and error classification into diagnostic,  
110 treatment, medication, or preventive categories. It also captures a brief description of the error,  
111 its impact on patients or processes, contributing factors (e.g., human or system-related), and  
112 details of actions taken for mitigation and prevention. The reporting officer fills out the initial  
113 13 fields, and the unit leader, often a nurse, completes the final sections to ensure  
114 comprehensive documentation. Physical copies of filled MER forms were submitted to the  
115 Patient Safety Unit every month.

### 116 **Study Population and Sampling**

117 All MER forms submitted during the study period were included in the analysis. All KNH  
118 clinical departments are encouraged to identify medical errors, document and submit filled  
119 MER forms to the patient safety unit monthly. Summary reports generated within the hospital  
120 and respective departments which didn't have individual forms were not included in the study.

### 121 **Data Collection Tool Development and Training**

122 A data abstraction tool was developed in REDCap, aligned with the World Health Organization  
123 (WHO) minimum information tool for MER[16]. Five research assistants (RAs) who were  
124 statistics and medical students from local universities, were selected and trained to use the  
125 online data collection tool. They familiarized themselves with MER forms and were supervised  
126 by the Principal Investigator (PI). The research assistants were supported to pilot at least 5  
127 forms each to ensure data accuracy during the first week of MER form abstraction.

### 128 **Data Collection Process**

129 RAs entered data in a designated room within the healthcare quality department, adhering to  
130 confidentiality and privacy guidelines. Clarifications on abbreviations, job roles, diseases, and  
131 clinical processes were provided using a glossary of commonly used terminologies at KNH.  
132 Data entry involved extracting information directly from the filled fields in the MER forms.  
133 Parts of the MER forms included short narratives describing what happened and the outcomes,  
134 while other sections featured checkboxes. In cases where data was missing, we utilized the  
135 brief narratives provided in the MER forms to construct certain fields. Throughout this process,  
136 the principal investigator and staff from the patient safety unit provided guidance to the  
137 research assistants.

### 138 **Variables of Interest**

139 The variables collected were the type of medical errors reported (diagnostic errors, treatment  
140 errors, medication errors, preventive errors, or other types), location (Accident and Emergency,  
141 Ward and other), Time (normal working hours- 8:00am to 5:00pm weekdays, and non-normal  
142

145 working hours), Contributing factors to error happening (Communication, Patient related, Staff  
146 related, Equipment related and Lack of policies).

147

## 148 **Data Analysis**

149 Descriptive analysis was conducted to summarize error types and subtypes. Continuous  
150 variables were presented as mean  $\pm$  standard deviation (SD), while categorical variables were  
151 reported as numbers and percentages. Chi-square test was used for inter-group comparisons of  
152 quantitative variables, with p-values  $<0.05$  considered statistically significant.

153 A multivariate logistic regression model was employed to analyse associations between  
154 diagnostic error types, time of error occurrence, and whether errors occurred within KNH. The  
155 model was adjusted, and odds ratios with a 95% confidence interval were calculated.  
156 McFadden's R<sup>2</sup> was used to assess model fit.

157 Data were analysed using Jamovi 2.3.21 and RStudio 4.2.2 which are open-source for statistical  
158 computing.

159

## 160 **Ethical consideration**

161 The study received ethics approval from the Kenyatta National Hospital-University of Nairobi  
162 Ethics Review Committee (Approval No. P847/10/2021) and obtained a research permit from  
163 the National Commission for Science Technology and Innovation (Permit Ref. 517313). The  
164 department involved authorized data collection using stored forms, with the Head of the unit  
165 signing an institutional research form. No identifiable information was collected from the  
166 forms, and no human samples or experiments were conducted as part of this research.

167

## 168 **RESULTS**

169 Six hundred and forty (640) medical error report forms were submitted to the Patient Safety  
170 Unit at the Kenyatta National Hospital. Age, diagnosis, and gender had 16.7%, 12.3%, and  
171 6.5% missing data, while the rest of the variables of interest had less than 5% missing data.

### 172 **Characteristics for patient's, medical errors, and location of reporting**

173 The distribution of medical errors in relation to gender, age, diagnoses, reporting personnel and  
174 their outcomes is shown in Table 1. There was a similar proportion between diagnostic and  
175 non-diagnostic errors, with males accounting for slightly more errors overall (54.2% of  
176 diagnostic errors vs. 52.9% of non-diagnostic errors). However, this difference was not  
177 statistically significant ( $p = 0.406$ ).

178 Although there was a higher proportion of errors occurring in the age group of 40-59 years for  
179 both diagnostic and non-diagnostic errors, the distribution between the errors with age was not  
180 statistically significant (Chi-square test;  $p=0.054$ ).

181 Surgical cases accounted for most errors in diagnostic and non-diagnostic categories (57.6%  
182 vs. 58.0%), followed by medical and oncology cases. No significant differences were observed  
183 in the distribution of error types across diagnoses ( $p = 0.655$ ).

184 Nurses were responsible for most error reports (99.2% overall), with minimal contributions  
185 from doctors and pharmacy staff. The difference in reporting personnel was not statistically  
186 significant ( $p = 0.185$ ). Most reported errors had good outcomes (84.2% overall), with a slightly  
187 higher proportion of poor outcomes associated with diagnostic errors (15.8%) compared to  
188 non-diagnostic errors (14.1%). However, this difference was not statistically significant ( $p =$   
189 0.215).

190

191 **Table 1. Distribution of medical errors in relation to gender, age, diagnoses, reporting**  
192 **personnel and their outcomes**

| Patient Characteristics |          | Totals     | Diagnostics | Nondiagnosics | p-value |
|-------------------------|----------|------------|-------------|---------------|---------|
| Gender                  |          |            |             |               |         |
|                         | Female   | 274(45.8%) | 105         | 169           | 0.406   |
|                         | Male     | 324(54.2%) | 135         | 189           |         |
| Age                     |          |            |             |               |         |
|                         | 0-19     | 65(12.3%)  | 21          | 44            | 0.054   |
|                         | 20-39    | 241(45.5%) | 98          | 143           |         |
|                         | 40-59    | 155(29.3%) | 72          | 83            |         |
|                         | 60-79    | 53(10.0%)  | 22          | 31            |         |
|                         | 80-99    | 16(3.0%)   | 2           | 14            |         |
| Diagnosis               |          |            |             |               |         |
|                         | Surgical | 324(57.6%) | 127         | 197           | 0.655   |
|                         | Medical  | 190(33.8%) | 82          | 108           |         |
|                         | Oncology | 49(8.7%)   | 19          | 30            |         |
| Person reporting        |          |            |             |               |         |
|                         | Doctor   | 3(0.5%)    | 0           | 3             | 0.185   |
|                         | Nurses   | 614(99.2%) | 248         | 366           |         |
|                         | Pharmacy | 2(0.3%)    | 0           | 2             |         |
| Outcomes                |          |            |             |               |         |
|                         | Good     | 539(84.2%) | 210         | 329           | 0.215   |
|                         | Poor     | 101(15.8%) | 46          | 55            |         |

193

194

### 195 **Location of reporting and Time period of error happening**

196 The location of reporting and time of error happening in the hospital is shown in Table 2.  
 197 Accident and Emergency (AE) had the highest proportion (45.5%) of diagnostic errors among  
 198 the three areas, followed by Wards (38.2%) and Other (31.9%). Other locations included  
 199 Theatre, Critical care units, and Pharmacy. The observed proportion of diagnostic errors was  
 200 higher during non-normal working hours (46.1%) compared to normal working hours  
 201 (35.1%).(Table 2)

202

203 **Table 2. Distribution by of error reporting in relation to location and time error happened**

| Diagnostic                               | NO         | YES        | TOTAL     |
|------------------------------------------|------------|------------|-----------|
| a) Location of Reporting                 |            |            |           |
| AE                                       | 122(54.5%) | 102(45.5%) | 224(100%) |
| Other                                    | 79(68.1%)  | 37(31.9%)  | 116(100%) |
| Ward                                     | 170(61.8%) | 105(38.2%) | 275(100%) |
| Total                                    | 371(60.3%) | 244(39.7%) | 615(100%) |
| b) Errors happened during working hours? |            |            |           |
| NO                                       | 153(53.9%) | 131(46.1%) | 284(100%) |
| YES                                      | 231(64.9%) | 125(35.1%) | 356(100%) |

204 TOTAL 384(60%) 256(40%) 640(100%)

205 **Types of Medical Errors reported**

206 The types of reported errors are shown in Table 3. Diagnostic errors and treatment errors  
 207 emerged as the most frequently reported types of medical errors. Diagnostic errors were  
 208 identified in 40% (256 forms) of the submissions. Treatment-related errors were the most  
 209 frequently reported, comprising 54.2% (347 forms) of the submissions, followed by medication  
 210 errors at 17.8% (114 forms). Other identified error categories included prevention (7.0%, 45  
 211 forms), documentation (16.3%, 104 forms), and miscellaneous errors classified as 'Others'  
 212 (20.3%, 130 forms).

213 Of the 256 reported diagnostic errors, the top three subtypes of errors reported were: delay in  
 214 diagnosis (45.9% of diagnostic errors), wrong diagnosis (27.2%), and failure to carry out  
 215 required test (8.7%). See Figure 1.

**Table 3; Type of Medical errors submitted**

| N=640                |      |          |
|----------------------|------|----------|
|                      | n(%) |          |
| <b>Diagnostocs</b>   |      |          |
| YES                  | 256  | (40%)    |
| NO                   | 384  | (60%)    |
| <b>Treatment</b>     |      |          |
| YES                  | 347  | (54.2%)  |
| NO                   | 293  | (45.78%) |
| <b>Medication</b>    |      |          |
| YES                  | 114  | (17.8%)  |
| NO                   | 526  | (62.1%)  |
| <b>Prevention</b>    |      |          |
| YES                  | 45   | (7.0%)   |
| NO                   | 595  | (92.9%)  |
| <b>Others</b>        |      |          |
| YES                  | 130  | (20.3%)  |
| NO                   | 510  | (76.7%)  |
| <b>Documentation</b> |      |          |
| YES                  | 104  | (16.3%)  |
| NO                   | 536  | (83.8%)  |

Note: For the forms that had more than 2 types of errors, the three most probable were entered.

216 Figure 1; Subtypes of diagnostic errors

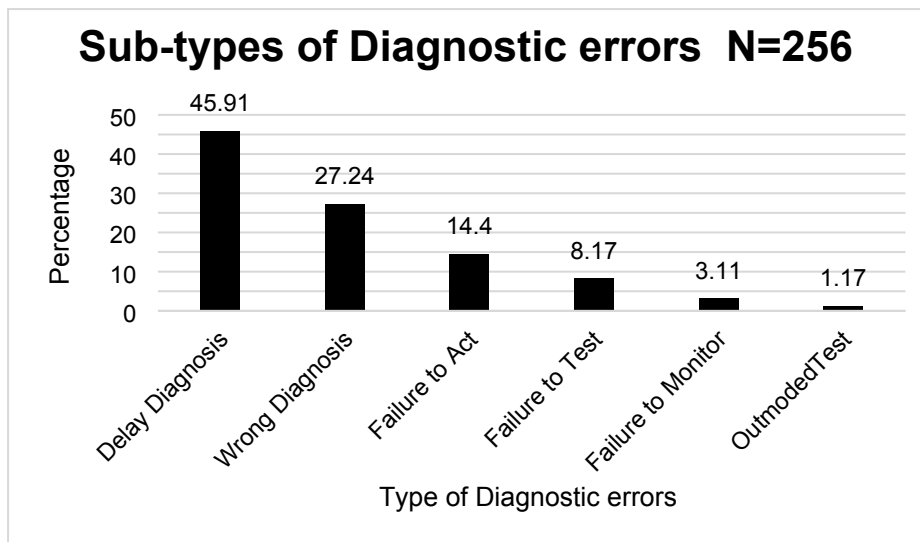

217  
218

219 **Contributing Factors to Medical Errors: Diagnostic vs. Non-Diagnostic**  
220 **Errors**

221 Various factors contributed to the occurrence of medical errors as shown on table 4. These  
222 included communication issues, accounting for 23.1% of cases, patient-related factors at  
223 11.6%, staff-related issues at 48.9%, equipment failures or deficiencies at 15.6%, and  
224 deficiencies in policies which contributed to 21.4% of the total 640 medical errors.

225 Communication issues were linked to 101 diagnostic errors and 130 non-diagnostic errors,  
226 revealing no statistically significant difference ( $p = 0.26$ ) in their influence on error occurrence.  
227 Out of the 74 medical errors attributed to patient-related factors, 34 were diagnostic errors and  
228 40 were non-diagnostic errors, with no statistically significant difference observed in their  
229 occurrence between the groups.

230 Staff-related factors were associated with 126 out of 313 diagnostic errors and 187 out of 313  
231 non-diagnostic errors, with no statistically significant difference observed ( $p = 0.89$ ) between  
232 the rates of diagnostic and non-diagnostic errors related to staff factors.

233 For equipment issues, 35 diagnostic errors and 65 non-diagnostic errors were attributed to lack  
234 or faulty equipment, with no statistically significant difference in their contribution to error  
235 occurrence ( $p = 0.27$ ).

236 Regarding the absence of policies or guidelines, 64 out of 137 diagnostic errors and 73 out of  
237 417 non-diagnostic errors were influenced by this factor, showing a trend towards significance  
238 ( $p = 0.07$ ) in the difference between diagnostic and non-diagnostic error rates related to policy  
239 deficiencies.

**Table 4; Contributing factors to diagnostic errors**

|                 | Totals     | Diagnosis Errors | Nondiagnostic Errors | p values |
|-----------------|------------|------------------|----------------------|----------|
| Communication   |            |                  |                      |          |
| YES             | 231(36.1%) | 101              | 130                  | 0.149    |
| NO              | 409(63.9%) | 155              | 254                  |          |
| Patient factors |            |                  |                      |          |
| YES             | 74(11.6%)  | 34               | 40                   | 0.26     |
| NO              | 566(88.4%) | 222              | 344                  |          |
| Staff factors   |            |                  |                      |          |
| YES             | 313(48.9%) | 126              | 187                  | 0.89     |

|                              |     |            |     |     |      |
|------------------------------|-----|------------|-----|-----|------|
|                              | NO  | 327(51.1%) | 130 | 197 |      |
| Equipment                    |     |            |     |     |      |
|                              | YES | 100(15.6%) | 35  | 65  | 0.27 |
|                              | NO  | 540(84.4%) | 221 | 319 |      |
| Lack of Policies/ guidelines |     |            |     |     |      |
|                              | YES | 137(21.4%) | 64  | 73  | 0.07 |
|                              | NO  | 503(78.6%) | 192 | 311 |      |

240

241 **Associations of factors with the likelihood of reporting diagnostic errors**

242 The odds of diagnostic error happening during the nonworking hours was 1.969 times that of  
 243 it happening during normal working hours OR 1.969 (95% CI:1.004, 1.406) and was  
 244 statistically significant at (p <0.047).

245 The odds of diagnostic error being reported in the Accident and Emergency unit was 2.36 times  
 246 that of it being reported in the wards OR 2.36 (95% CI: 1.069, 1.589) and was statistically  
 247 significant at (p <0.022).

248 The odds of diagnostic error happening in KNH was 1.195 times that of it happening outside  
 249 KNH OR 1.195 (95% CI:1.354, 2.444) and was statistically significant at (p <0.003). Note that  
 250 KNH is a tertiary institution that receives referral from lower level facilities from within the  
 251 environs of Nairobi and country Kenya.

252

253 **Table 5: Associations of factors with the likelihood of reporting diagnostic errors**

254 (Reference level; Diagnostic- NO, Normal working hours reference-YES, Location KNH  
 255 reference NO, Location of reporting -Ward).

Model Coefficients - Diagnostic

| Predictor                  | Estimate | SE    | Z    | P     | Odds ratio | 95% Confidence Interval |       |
|----------------------------|----------|-------|------|-------|------------|-------------------------|-------|
|                            |          |       |      |       |            | Lower                   | Upper |
| Intercept                  | -1.49    | 0.332 | -4.5 | <.001 | 0.225      | 0.118                   | 0.431 |
| Normal Working Hours:      |          |       |      |       |            |                         |       |
| NO – YES                   | 0.341    | 0.172 | 1.98 | 0.047 | 1.406      | 1.004                   | 1.969 |
| Location of Reporting:     |          |       |      |       |            |                         |       |
| AE – Ward                  | 0.463    | 0.202 | 2.29 | 0.022 | 1.589      | 1.069                   | 2.362 |
| Other –<br>Ward            | -0.284   | 0.236 | -1.2 | 0.228 | 0.753      | 0.475                   | 1.195 |
| Location of Error<br>KNH?: |          |       |      |       |            |                         |       |
| YES – NO                   | 0.894    | 0.301 | 2.96 | 0.003 | 2.444      | 1.354                   | 4.412 |

Note. Estimates represent the log odds of "Diagnostic = YES" vs. "Diagnostic = NO"

256 R<sup>2</sup>McF 0.0235

257

258

259

260 **DISCUSSION**

261 Diagnostic errors are the second most common medical errors submitted to the hospital MER  
 262 system, following treatment errors. The Accident and Emergency department had a higher



263 likelihood of reporting diagnostic errors compared to the wards, and more reports of diagnostic  
264 errors occurred during non-working hours than during normal working hours.

### 265 **The incidence of diagnostic errors**

266 Diagnostic errors account for a significant portion (40%) of reported errors at KNH. A study  
267 in Uganda by Katongole, found Diagnostic errors being the commonest errors among 618  
268 charts abstracted and accounted for 40.5% of all the ME, the same study also found Healthcare  
269 Workers (HCW) stated the perceived frequency of medication errors (58%) and diagnostic  
270 errors (53%)[17]. This finding are similar to the incidence in this study, likely because of  
271 similar setting, though the Uganda study was not from a voluntary reporting system. In a  
272 primary care setting in the UK Aveery et al found ; 60.8% of the adverse events reported were  
273 diagnostic errors. This study by Aveery et al had a small sample size of 74, likely explaining  
274 the high proportions[18]. However, a review of a nationwide incidence reporting in the same  
275 country between 2003-2005 indicated a lower incidence at 0.5% [4].

276 A review of studies in the USA found the incidence of diagnostic errors in the hospital setting  
277 to be between 6.4%-17% of the adverse events[1]. The difference can be explained by the  
278 larger sample size.  
279

280 **Patient characteristics** The commonest age group in this study was 20-39 years, which  
281 comprised 45% of the forms, while the male to female ratio was 1:1.2. Aoki et al, did a patient  
282 reported study on diagnostic errors in Japan, where the commonest age group was 60-79 years  
283 (61%), while this study had a younger age group as the most frequent [19]. The study in Japan  
284 was an outpatient study and also the population in Japan having much older population than  
285 that in Kenya where this study was done. Gende distribution in this study in fairly comparable  
286 to that in the Japan study; male: female ration 1:1.2 [19].  
287

288 Patients with oncology diagnosis made 8.75%, surgical 57.6%, and medical 33.8%. Oncology  
289 patients in the study by Aoki et al. were similar at 8.3%, while the medical and Surgical was  
290 47.2% and 43.7% respectively[19]. Patients with medical diagnosis were more in the study by  
291 Aoki because of this being a primary care setting, while the surgical diagnosis was higher in  
292 our study because the hospital provides emergency care services.  
293

294 The vast majority (99.2%) of forms submitted to the system were from nurses. Research shows  
295 that nurses consistently report a higher percentage of errors (67%-93%) compared to doctors  
296 (2%-23%) in incident reporting systems. Even when comparing the proportion of nurses  
297 reporting to their total number versus doctors reporting to the total number of doctors, nurses  
298 still have a higher percentage reporting. At KNH, the nursing department has made medical  
299 error reporting a performance target, which has increased awareness of MER compared to the  
300 doctors.  
301

302 The likelihood of diagnostic errors happening during non-working hours were 1.96 more than  
303 during the normal working hours. A study in the Saudia Arabia established that medication  
304 errors were more likely to happen at night compared to the day duty[21]. This is similar to this  
305 study, human factor challenges are more apparent at night than normal hours.  
306

### 307 **Diagnostic errors at Accident and Emergency**

308 In this study A&E had the highest proportion (45.5%) of diagnostic errors among the three  
309 areas, followed by Ward (38.2%) and Other (31.9%). Evaluating the diagnostic errors in the  
310 National UK reporting system, diagnostic incidents were thus less likely to occur in a ward ( $P$   
311  $< 0.002$ ) and more likely to occur in an emergency department ( $P < 0.002$ ) than other  
312 incidents[4]. The higher percentage of diagnostic errors in A&E suggests a higher likelihood  
313 more errors happening during transitions and primary care.

314

### 315 **Contributing factors of errors happening**

316 Staff factors(48%), Communication(36%) and lack of policies(21%) were the three leading  
317 contributing factors to medical errors occurring in this study. While reviewing surgical  
318 medical-legal cases in a Canadian study, provider and communication factors contributed to  
319 80% and 50% of the cases respectively[14]. A multicentre study among 71 Dutch hospitals  
320 also identified human error and communication among the teams as the common contributing  
321 factors to diagnostic errors[15]. In deed this is similar to our study where Staff related issues  
322 and communication topped the list.

323

### 324 **Study limitation**

325 The study's scope encompasses a retrospective analysis of medical error reports at KNH over  
326 three years, focusing on diagnostic errors. Limitations include potential underreporting and  
327 incomplete data within the MER system. Some of the fields had multiple types of medical  
328 errors and contributing factors, which were handled by data cleaning, this has been described  
329 in the methods section.

330

### 331 **CONCLUSION**

332 Diagnostic errors are the second most common medical errors submitted to the hospital MER  
333 system, following treatment errors.. Accident and emergency is an important area of focus for  
334 identification of diagnostic errors from other levels of care and also those errors made during  
335 emergency care. This is the first study to describe the patterns in the KNH medical error  
336 reporting system. Strategies of involving more doctors in documentation of medical error using  
337 the MER form should be implemented. Research using chart abstraction and patient reported  
338 diagnostic errors is likely to offer more information on the prevalence of diagnostic error, and  
339 shade light on the diagnostic process than this descriptive study.

340

### 341 **REFERENCES**

- 342 [1] Balogh EP, Miller BT, Ball JR. *Improving diagnosis in health care*. National  
343 Academies Press, 2016. Epub ahead of print 29 January 2016. DOI: 10.17226/21794.
- 344 [2] Hardeep Singh. Diagnostic Errors; Moving beyond 'no respect' and getting ready for  
345 prime time. *BMJ Quality and Safety*; 22. Epub ahead of print 2013. DOI:  
346 10.1136/bmjqs-2013-001827.
- 347 [3] Singh H, Meyer AND, Thomas EJ. The frequency of diagnostic errors in outpatient  
348 care: Estimations from three large observational studies involving US adult  
349 populations. *BMJ Qual Saf* 2014; 23: 727–731.
- 350 [4] Sevdalis N, Jacklin R, Arora S, et al. Diagnostic error in a national incident reporting  
351 system in the UK. *J Eval Clin Pract* 2010; 16: 1276–1281.
- 352 [5] Singh H. Diagnostic errors: Moving beyond 'no respect' and getting ready for prime  
353 time. In: *BMJ Quality and Safety*. 2013, pp. 789–792.
- 354 [6] Graber ML. The incidence of diagnostic error in medicine. *BMJ Qual Saf* 2013; 22:  
355 ii21-i27.
- 356 [7] Graber ML. Diagnostic errors in medicine: a case of neglect. *BMJ Qual Saf* 2005; 31:  
357 106–113.
- 358 [8] Henriksen K, Brady J. The pursuit of better diagnostic performance: A human factors  
359 perspective. *BMJ Quality and Safety*; 22. Epub ahead of print 2013. DOI:  
360 10.1136/bmjqs-2013-001827.
- 361 [9] Saposnik G, Redelmeier D, Ruff CC, et al. Cognitive biases associated with medical  
362 decisions: a systematic review. *BMC Med Inform Decis Mak* 2016; 16: 1–14.

- 363 [10] Hall KK S-HSHL et al. *Making Healthcare Safer III: A Critical Analysis of Existing and*  
364 *Emerging Patient Safety Practices*. 1st ed. Rockville (MD): Rockville (MD), 2020.
- 365 [11] Macrae C. The problem with incident reporting. *BMJ Qual Saf* 2016; 25: 71–75.
- 366 [12] Kawamura R HYSSNYKSST. Incidence of Diagnostic Errors Among Unexpectedly  
367 Hospitalized Patients Using an Automated Medical History-Taking System With a  
368 Differential Diagnosis Generator: Retrospective Observational Study. *JMIR Med*  
369 *Inform*; 27;
- 370 [13] Zwaan L de BMWCTASM van der WGTD. Patient record review of the incidence,  
371 consequences, and causes of diagnostic adverse events. *Arch Intern Med* 2010; 28:  
372 1015–1021.
- 373 [14] Kwan JL, Calder LA, Bowman CL, et al. Characteristics and contributing factors of  
374 diagnostic error in surgery: analysis of closed medico-legal cases and complaints in  
375 Canada. *Canadian Journal of Surgery* 2024; 67: E58–E65.
- 376 [15] Hooftman J, Dijkstra AC, Suurmeijer I, et al. Common contributing factors of  
377 diagnostic error: A retrospective analysis of 109 serious adverse event reports from  
378 Dutch hospitals. *BMJ Qual Saf*. Epub ahead of print 2023. DOI: 10.1136/bmjqs-2022-  
379 015876.
- 380 [16] WHO WHO. Minimum information model for Patient safety incident reporting and  
381 learning system. *WHO Document Production Services*,  
382 [https://iris.who.int/bitstream/handle/10665/255642/WHO-HIS-SDS-2016.22-](https://iris.who.int/bitstream/handle/10665/255642/WHO-HIS-SDS-2016.22-eng.pdf?sequence=1)  
383 [eng.pdf?sequence=1](https://iris.who.int/bitstream/handle/10665/255642/WHO-HIS-SDS-2016.22-eng.pdf?sequence=1) (2016, accessed 10 May 2024).
- 384 [17] Peter KS, Anguyo R, Onzima DDM, et al. Common Medical Errors and Error  
385 Reporting Systems in Selected Hospitals of Central Uganda. *Int J Public Health Res*  
386 2015; 3: 292–299.
- 387 [18] Avery AJ, Sheehan C, Bell B, et al. Incidence, nature and causes of avoidable  
388 significant harm in primary care in England: Retrospective case note review. *BMJ*  
389 *Quality and Safety* 2021; 30: 961–976.
- 390 [19] Aoki T, Watanuki S. Multimorbidity and patient-reported diagnostic errors in the  
391 primary care setting: Multicentre cross-sectional study in Japan. *BMJ Open*; 10. Epub  
392 ahead of print 20 August 2020. DOI: 10.1136/bmjopen-2020-039040.
- 393 [20] Wolf ZR, Hughes RG. Error Reporting and Disclosure. In: Hughes RG (ed) *Patient*  
394 *Safety and Quality: An Evidence-Based Handbook for Nurses*. Rockville: AHRQ,  
395 2008.
- 396 [21] Aljuaid M, Alajman N, Alsafadi A, et al. Medication error during the day and night shift  
397 on weekdays and weekends: A single teaching hospital experience in Riyadh, Saudi  
398 Arabia. *Risk Manag Healthc Policy* 2021; 14: 2571–2578.

399  
400  
401  
402  
403  
404  
405  
406  
407
